# Supplementary material for: Optimization and validation of a two-step method for the determination of polybrominated diphenyl ethers in Croatian house dust samples
Source: Royal Society of Chemistry journal article supplement (doi:10.1039/d1ay00695a), 2021-01-01
Supplement: d1ay00695a1.pdf [file d1ay00695a1.pdf]

Supplementary Information for:

**Optimization and validation of two-step method for determination of polybrominated diphenyl ethers in Croatian house dust samples**

Karla Jagić<sup>1, a</sup>, Marija Dvorščak<sup>1, \*</sup>, Andreja Jurič<sup>2</sup>, Toni Safner<sup>3</sup>, Darija Klinčić<sup>1, a</sup>

\*corresponding author (mdvorscak@imi.hr) Biochemistry and Organic Analytical Chemistry Unit, Institute for Medical Research and Occupational Health, Ksaverska c. 2, HR-10001 Zagreb, Croatia

Table S1. Quantitative factors set-up for MAE optimization using full factorial design (each run was repeated with *n*-hexane:acetone (1:1, v/v) and *n*-hexane:ultrapure water (10:1, v/v) as solvents)

| Experiment | Temperature / °C | Solvent volume / mL | Extraction time / min |
|------------|------------------|---------------------|-----------------------|
| 1          | 100              | 30                  | 12,5                  |
| 2          | 80               | 40                  | 5                     |
| 3          | 80               | 40                  | 5                     |
| 4          | 80               | 20                  | 20                    |
| 5          | 100              | 30                  | 12.5                  |
| 6          | 80               | 20                  | 5                     |
| 7          | 120              | 20                  | 5                     |
| 8          | 120              | 40                  | 5                     |
| 9          | 120              | 40                  | 20                    |
| 10         | 100              | 30                  | 12.5                  |
| 11         | 120              | 20                  | 5                     |
| 12         | 100              | 30                  | 12.5                  |
| 13         | 80               | 40                  | 20                    |
| 14         | 120              | 20                  | 20                    |
| 15         | 80               | 20                  | 20                    |
| 16         | 120              | 40                  | 5                     |
| 17         | 80               | 40                  | 20                    |
| 18         | 80               | 20                  | 5                     |
| 19         | 120              | 40                  | 20                    |
| 20         | 120              | 20                  | 20                    |

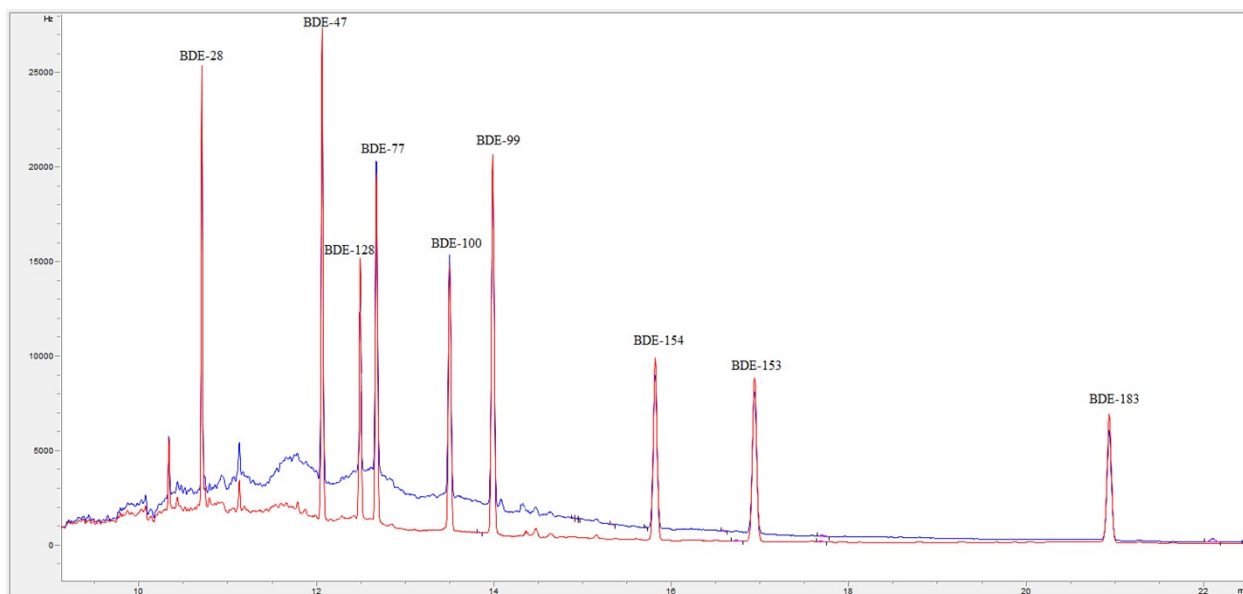

Figure S1. GC-ECD chromatogram of house dust samples with PBDEs added at concentrations of 50 ng mL<sup>-1</sup> into dust extract prior the clean-up on SPE columns SA2 (red) and SAB2 (blue)
